# Supplementary material for: Metal additive manufacturing and possible clinical markers for the monitoring of exposure-related health effects
Source: PubMed Central journal article supplement (PMC7971853; doi:10.1371/journal.pone.0248601), 2021-03-18
Supplement: pone.0248601.s004.pdf [file pone.0248601.s004.pdf]

**PAST/PRESENT DISEASES/SYMPTOMS**

|     |                                       | Yes                      | No                       | If Yes:<br>during the last year? |                          |
|-----|---------------------------------------|--------------------------|--------------------------|----------------------------------|--------------------------|
|     |                                       | (1)                      | (2)                      | Yes                              | No                       |
|     |                                       | (1)                      | (2)                      | (1)                              | (2)                      |
| 1-2 | Have you ever had asthmatic problems? | <input type="checkbox"/> | <input type="checkbox"/> | <input type="checkbox"/>         | <input type="checkbox"/> |
| 3-4 | Have you ever suffered from hayfever? | <input type="checkbox"/> | <input type="checkbox"/> | <input type="checkbox"/>         | <input type="checkbox"/> |
| 5-6 | Have you ever suffered from eczema?   | <input type="checkbox"/> | <input type="checkbox"/> | <input type="checkbox"/>         | <input type="checkbox"/> |

**PRESENT SYMPTOMS**

During the **last three months** have you had any of the following symptoms?  
(Answer every question even if you have not had any symptoms!)

|       |                                            | Yes, often<br>(every week) | Yes,<br>sometimes        | No,<br>never             | If YES:<br>do you believe that it is<br>due to your work<br>environment? |                          |
|-------|--------------------------------------------|----------------------------|--------------------------|--------------------------|--------------------------------------------------------------------------|--------------------------|
|       |                                            | (1)                        | (2)                      | (3)                      | Yes                                                                      | No                       |
|       |                                            | (1)                        | (2)                      | (3)                      | (1)                                                                      | (2)                      |
| 7-8   | Fatigue                                    | <input type="checkbox"/>   | <input type="checkbox"/> | <input type="checkbox"/> | <input type="checkbox"/>                                                 | <input type="checkbox"/> |
| 9-10  | Feeling heavy-headed                       | <input type="checkbox"/>   | <input type="checkbox"/> | <input type="checkbox"/> | <input type="checkbox"/>                                                 | <input type="checkbox"/> |
| 11-12 | Headache                                   | <input type="checkbox"/>   | <input type="checkbox"/> | <input type="checkbox"/> | <input type="checkbox"/>                                                 | <input type="checkbox"/> |
| 13-14 | Nausea/dizziness                           | <input type="checkbox"/>   | <input type="checkbox"/> | <input type="checkbox"/> | <input type="checkbox"/>                                                 | <input type="checkbox"/> |
| 15-16 | Difficulties concentrating                 | <input type="checkbox"/>   | <input type="checkbox"/> | <input type="checkbox"/> | <input type="checkbox"/>                                                 | <input type="checkbox"/> |
| 17-18 | Itching, burning or irritation of the eyes | <input type="checkbox"/>   | <input type="checkbox"/> | <input type="checkbox"/> | <input type="checkbox"/>                                                 | <input type="checkbox"/> |
| 19-20 | Irritated, stuffy or runny nose            | <input type="checkbox"/>   | <input type="checkbox"/> | <input type="checkbox"/> | <input type="checkbox"/>                                                 | <input type="checkbox"/> |
| 21-22 | Hoarse, dry throat                         | <input type="checkbox"/>   | <input type="checkbox"/> | <input type="checkbox"/> | <input type="checkbox"/>                                                 | <input type="checkbox"/> |
| 23-24 | Cough                                      | <input type="checkbox"/>   | <input type="checkbox"/> | <input type="checkbox"/> | <input type="checkbox"/>                                                 | <input type="checkbox"/> |
| 25-26 | Dry or flushed facial skin                 | <input type="checkbox"/>   | <input type="checkbox"/> | <input type="checkbox"/> | <input type="checkbox"/>                                                 | <input type="checkbox"/> |
| 27-28 | Scaling/itching scalp or ears              | <input type="checkbox"/>   | <input type="checkbox"/> | <input type="checkbox"/> | <input type="checkbox"/>                                                 | <input type="checkbox"/> |
| 29-30 | Hands dry, itching, red skin               | <input type="checkbox"/>   | <input type="checkbox"/> | <input type="checkbox"/> | <input type="checkbox"/>                                                 | <input type="checkbox"/> |
| 31-32 | Other .....                                | <input type="checkbox"/>   | <input type="checkbox"/> | <input type="checkbox"/> | <input type="checkbox"/>                                                 | <input type="checkbox"/> |

**FURTHER COMMENTS**

.....

.....

.....

.....

.....

**THANK YOU!**
